# Supplementary material for: Synthesis of gold, silver and their alloy nanoparticles using bovine serum albumin as foaming and stabilizing agent
Source: Royal Society of Chemistry journal article supplement (doi:10.1039/b510398c), 2005-01-01
Supplement: b510398c.pdf [file b510398c.pdf]

**Supplementary Information for**  
**Synthesis of gold, silver and their alloy nanoparticles using bovine serum albumin**  
**as foaming and stabilizing agent**

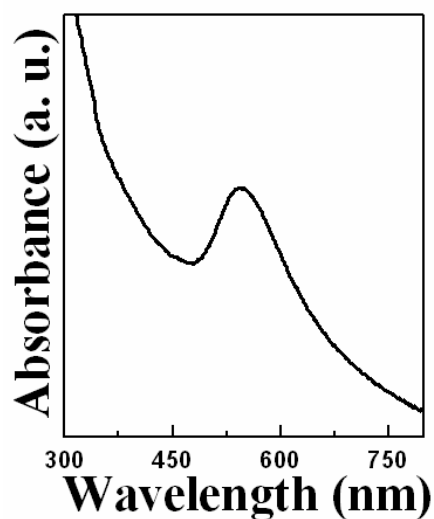

**Fig. S1:** Uv-Vis spectra of colloid nanoparticles obtained from a foam matrix formed by taking a mixture of 50 ml of CTAB ( $2 \times 10^{-2}$  M) and 25ml each of  $\text{HAuCl}_4$  ( $3 \times 10^{-3}$  M) and  $\text{Ag}_2\text{SO}_4$  ( $1 \times 10^{-3}$  M). The characteristic absorbance at  $\sim 545$  nm clearly proves that only gold nanoparticles are formed in this experiment. An experiment under exactly identical conditions with BSA as a foaming surfactant resulted in the Au-Ag alloy formation.

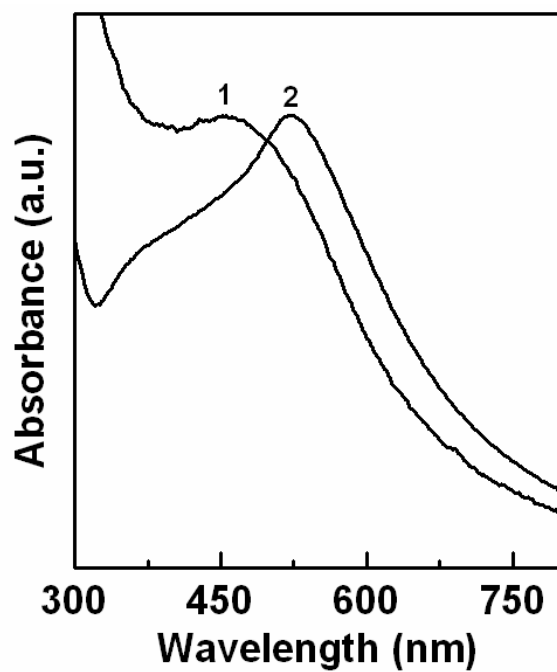

**Fig. S2:** UV-vis spectra of nanoparticles obtained 1) BSA-capped Au-Ag alloy NP solution obtained from 3Au:1Ag mixture in BSA foam and 2) when the reduction is carried in a solution mixture of 3AuCl<sub>4</sub><sup>-</sup>:1Ag<sup>+</sup>:BSA.
